# Supplementary material for: Physico-Chemical and Ecotoxicological Evaluation of Marine Sediments Contamination: A Case Study of Rovinj Coastal Area, NE Adriatic Sea, Croatia
Source: MDPI journal article supplement (doi:10.3390/toxics10080478), 2022-08-16
Supplement: s1 [file s1]

**Table S1.** Grain size data of marine sediments.

| Location                    |                             | S1             | S2          | S3             | S4             | S5          |
|-----------------------------|-----------------------------|----------------|-------------|----------------|----------------|-------------|
|                             |                             | Harbour        | Shipyard    | Lim Bay out    | Lim Bay middle | Open Sea    |
| Total gravel                | > 2 mm (%)                  | 13.04          | 0.74        | 0.27           | 0.41           | 11.07       |
| Total sand                  | 63 $\mu\text{m}$ – 2 mm (%) | 67.32          | 54.17       | 5.44           | 4.55           | 72.60       |
| Total mud                   | < 63 $\mu\text{m}$ (%)      | 19.64          | 45.09       | 94.29          | 95.04          | 16.33       |
| Sediment type               |                             | slightly grav- | gravelly    | slightly grav- | sandy          | slightly    |
|                             |                             | elly muddy     | muddy       | elly muddy     | gravelly       | gravelly    |
|                             |                             | <b>sand</b>    | <b>sand</b> | <b>sand</b>    | <b>mud</b>     | <b>mud</b>  |
| Mean size ( $\mu\text{m}$ ) |                             | 167            | 72          | 45             | 45             | 175         |
| Sorting                     |                             | very poorly    | poorly      | well           | very well      | very poorly |

**Table S2.** Correlation coefficients (*r*) of metals (As, Cd, Cu, Ni, Pb, Zn, Hg, Cr), total  $\Sigma$ PAHs and  $\Sigma$ PCBs,  $\Sigma Q_{N1}$  and  $Q_{PECm}$  evaluation, probabilities of a toxic effect ( $P_{avg}$  and  $P_{max}$ ), and Phytotoxicity (SG, RL, BP, PI) results of marine sediments contamination analyses.

|                                   | As    | Cd     | Cu     | Ni     | Pb     | Zn    | Hg     | Cr     | $\Sigma$ PAHs | $\Sigma$ PCBs | $P_{avg}$ | $P_{max}$ | $\Sigma Q_{N1}$ | $Q_{PECm}$ | SG    | RL    | BP    | PI     |
|-----------------------------------|-------|--------|--------|--------|--------|-------|--------|--------|---------------|---------------|-----------|-----------|-----------------|------------|-------|-------|-------|--------|
| <b>As</b>                         | -     | -0.11  | 0.18   | 0.15   | -0.04  | -0.01 | 0.06   | 0.01   | 0.47          | 0.31          | 0.40      | 0.51      | 0.46            | 0.46       | 0.43  | 0.24  | 0.23  | 0.36   |
| <b>Cd</b>                         | -0.11 | -      | 0.96*  | 0.42   | 0.97** | 0.79  | 0.98** | -0.38  | 0.64          | 0.86          | 0.61      | 0.51      | 0.76            | 0.76       | 0.10  | 0.43  | 0.66  | 0.29   |
| <b>Cu</b>                         | 0.18  | 0.96*  | -      | -0.39  | 0.95*  | 0.77  | 0.99** | -0.39  | 0.80          | 0.95*         | 0.74      | 0.67      | 0.90*           | 0.90*      | 0.26  | 0.52  | 0.75  | 0.42   |
| <b>Ni</b>                         | 0.15  | 0.42   | -0.39  | -      | -0.60  | 0.21  | -0.44  | 0.99** | -0.51         | -0.54         | -0.35     | 0.07      | -0.35           | -0.34      | -0.05 | 0.14  | -0.10 | 0.00   |
| <b>Pb</b>                         | -0.04 | 0.97** | 0.95*  | -0.60  | -      | 0.064 | 0.98** | -0.58  | 0.73          | 0.92*         | 0.65      | 0.47      | 0.80            | 0.80       | 0.14  | 0.36  | 0.63  | 0.28   |
| <b>Zn</b>                         | -0.01 | 0.79   | 0.77   | 0.21   | 0.064  | -     | 0.77   | 0.25   | 0.39          | 0.58          | 0.46      | 0.64      | 0.62            | 0.62       | 0.14  | 0.61  | 0.70  | 0.37   |
| <b>Hg</b>                         | 0.06  | 0.98** | 0.99** | -0.44  | 0.98** | 0.77  | -      | -0.42  | 0.77          | 0.94*         | 0.72      | 0.62      | 0.86            | 0.86       | 0.23  | 0.50  | 0.73  | 0.40   |
| <b>Cr</b>                         | 0.01  | -0.38  | -0.39  | 0.99** | -0.58  | 0.25  | -0.42  | -      | -0.53         | -0.55         | -0.35     | 0.06      | -0.37           | -0.36      | -0.05 | 0.18  | -0.06 | 0.02   |
| <b><math>\Sigma</math>PAHs</b>    | 0.47  | 0.64   | 0.80   | -0.51  | 0.73   | 0.39  | 0.77   | -0.53  | -             | 0.94*         | 0.96**    | 0.81      | 0.96**          | 0.96**     | 0.70  | 0.66  | 0.82  | 0.74   |
| <b><math>\Sigma</math>PCBs</b>    | 0.31  | 0.86   | 0.95*  | -0.54  | 0.92*  | 0.58  | 0.94*  | -0.55  | 0.94*         | -             | 0.87      | 0.72      | 0.96**          | 0.96**     | 0.46  | 0.56  | 0.78  | 0.56   |
| <b><math>P_{avg}</math></b>       | 0.40  | 0.61   | 0.74   | -0.35  | 0.65   | 0.46  | 0.72   | -0.35  | 0.96**        | 0.87          | -         | 0.90*     | 0.94*           | 0.94*      | 0.83  | 0.83  | 0.93* | 0.88*  |
| <b><math>P_{max}</math></b>       | 0.51  | 0.51   | 0.67   | 0.07   | 0.47   | 0.64  | 0.62   | 0.06   | 0.81          | 0.72          | 0.90      | -         | 0.87            | 0.87       | 0.82  | 0.93* | 0.94* | 0.91*  |
| <b><math>\Sigma Q_{N1}</math></b> | 0.46  | 0.76   | 0.90*  | -0.35  | 0.80   | 0.62  | 0.86   | -0.37  | 0.96**        | 0.96**        | 0.94      | 0.87      | -               | 1**        | 0.62  | 0.72  | 0.88  | 0.72   |
| <b><math>Q_{PECm}</math></b>      | 0.46  | 0.76   | 0.90*  | -0.34  | 0.80   | 0.62  | 0.86   | -0.36  | 0.96**        | 0.96**        | 0.94      | 0.87      | 1**             | -          | 0.62  | 0.72  | 0.88* | 0.72   |
| <b>SG</b>                         | 0.43  | 0.10   | 0.26   | -0.05  | 0.14   | 0.14  | 0.23   | -0.05  | 0.70          | 0.46          | 0.83      | 0.82*     | 0.62            | 0.62       | -     | 0.86  | 0.78  | 0.97** |

| A) Seed Germination Inhibition - SG      |                       |             |         |         |       |       |       |       |       |      |
|------------------------------------------|-----------------------|-------------|---------|---------|-------|-------|-------|-------|-------|------|
| 30 x 30 seeds of <i>L. usitatissimum</i> |                       |             |         |         |       |       |       |       |       |      |
| Plate: A Subsample                       | Seed Germination (SG) | Sample Unit | Control | S1      | S2    | S3    | S4    | S5    |       |      |
| 1                                        | (No)                  |             | 27      | 15      | 9     | 11    | 24    | 26    |       |      |
| 2                                        | (No)                  |             | 26      | 12      | 10    | 13    | 25    | 26    |       |      |
| 3                                        | (No)                  |             | 27      | 16      | 9     | 9     | 25    | 27    |       |      |
| Germinated seeds                         |                       |             | (Mean)  | 26.67   | 14.33 | 9.33  | 11.00 | 24.67 | 26.33 |      |
| Germination                              |                       |             | (%)     | 88.89   | 47.78 | 31.11 | 36.67 | 82.22 | 87.78 |      |
| Seed Germination                         |                       |             | (%)     | 0.00    | 46.25 | 65.00 | 58.75 | 7.50  | 1.25  |      |
| 30 x 30 seeds of <i>L. usitatissimum</i> |                       |             |         |         |       |       |       |       |       |      |
| Plate: B Subsample                       | Seed Germination (SG) | Sample Unit | Control | S1      | S2    | S3    | S4    | S5    |       |      |
| 1                                        | (No)                  |             | 25      | 16      | 12    | 8     | 23    | 27    |       |      |
| 2                                        | (No)                  |             | 28      | 18      | 13    | 6     | 23    | 25    |       |      |
| 3                                        | (No)                  |             | 27      | 18      | 14    | 9     | 25    | 25    |       |      |
| Germinated seeds                         |                       |             | (Mean)  | 26.67   | 17.33 | 13.00 | 7.67  | 23.67 | 25.67 |      |
| Germination                              |                       |             | (%)     | 88.89   | 57.78 | 43.33 | 25.56 | 78.89 | 85.56 |      |
| Seed Germination                         |                       |             | (%)     | 0.00    | 35.00 | 51.25 | 71.25 | 11.25 | 3.75  |      |
| 30 x 30 seeds of <i>L. usitatissimum</i> |                       |             |         |         |       |       |       |       |       |      |
| Plate: C Subsample                       | Seed Germination (SG) | Sample Unit | Control | S1      | S2    | S3    | S4    | S5    |       |      |
| 1                                        | (No)                  |             | 29      | 17      | 10    | 9     | 25    | 25    |       |      |
| 2                                        | (No)                  |             | 30      | 18      | 11    | 10    | 23    | 25    |       |      |
| 3                                        | (No)                  |             | 27      | 20      | 14    | 12    | 23    | 26    |       |      |
| Germinated seeds                         |                       |             | (Mean)  | 28.67   | 18.33 | 11.67 | 10.33 | 23.67 | 25.33 |      |
| Germination                              |                       |             | (%)     | 95.56   | 61.11 | 38.89 | 34.44 | 78.89 | 84.44 |      |
| Seed Germination                         |                       |             | (%)     | 0.00    | 36.05 | 59.30 | 63.95 | 17.44 | 11.63 |      |
| 30 x 30 seeds of <i>L. usitatissimum</i> |                       |             |         |         |       |       |       |       |       |      |
| Plate: A Subsample                       | Root Length (RL)      | Sample Unit | Control | S1      | S2    | S3    | S4    | S5    |       |      |
| 1                                        | Root Length RL        | (mm) (%)    | 85.9    | 50.3    | 59.3  | 48.2  | 67.7  | 81    |       |      |
|                                          |                       |             | 0.00    | 41.44   | 30.97 | 43.89 | 21.19 | 5.70  |       |      |
| 2                                        | Root Length RL        | (g) (%)     | 78.7    | 53.2    | 58.9  | 50.2  | 64.8  | 74.4  |       |      |
|                                          |                       |             | 0.00    | 32.40   | 25.16 | 36.21 | 17.66 | 5.46  |       |      |
| 3                                        | Root Length RL        | (g) (%)     | 83.5    | 49.4    | 51.4  | 45.2  | 58.6  | 80.3  |       |      |
|                                          |                       |             | 0.00    | 40.84   | 38.44 | 45.87 | 29.82 | 3.83  |       |      |
|                                          |                       |             | RL      | Average | 0.00  | 38.23 | 31.52 | 41.99 | 22.89 | 5.00 |
|                                          |                       |             | StDev   | 0.00    | 5.05  | 6.66  | 5.10  | 6.26  | 1.02  |      |
| 30 x 30 seeds of <i>L. usitatissimum</i> |                       |             |         |         |       |       |       |       |       |      |
| Plate: B Subsample                       | Root Length (RL)      | Sample Unit | Control | S1      | S2    | S3    | S4    | S5    |       |      |
| 1                                        | Root Length RL        | (mm) (%)    | 81.6    | 52.1    | 61.4  | 45.3  | 63.4  | 78.3  |       |      |
|                                          |                       |             | 0.00    | 36.15   | 24.75 | 44.49 | 22.30 | 4.04  |       |      |
| 2                                        | Root Length RL        | (g) (%)     | 78.2    | 58.6    | 64.7  | 51.3  | 66.5  | 72.2  |       |      |
|                                          |                       |             | 0.00    | 25.06   | 17.26 | 34.40 | 14.96 | 7.67  |       |      |
| 3                                        | Root Length RL        | (g) (%)     | 85.2    | 46.7    | 49.3  | 47.9  | 61.7  | 79.8  |       |      |
|                                          |                       |             | 0.00    | 45.19   | 42.14 | 43.78 | 27.58 | 6.34  |       |      |
|                                          |                       |             | RL      | Average | 0.00  | 35.47 | 28.05 | 40.89 | 21.62 | 6.02 |
|                                          |                       |             | StDev   | 0.00    | 10.08 | 12.76 | 5.63  | 6.34  | 1.84  |      |
| 30 x 30 seeds of <i>L. usitatissimum</i> |                       |             |         |         |       |       |       |       |       |      |
| Plate: C Subsample                       | Root Length (RL)      | Sample Unit | Control | S1      | S2    | S3    | S4    | S5    |       |      |
| 1                                        | Root Length RL        | (mm) (%)    | 91.4    | 53.7    | 56.9  | 44.1  | 70.1  | 73.5  |       |      |
|                                          |                       |             | 0.00    | 41.25   | 37.75 |       |       |       |       |      |

| Germination test results | Sample Unit | Control | S1    | S2    | S3    | S4    | S5   |
|--------------------------|-------------|---------|-------|-------|-------|-------|------|
| SG                       | (%)         | 0       | 39.10 | 58.52 | 64.65 | 12.06 | 5.54 |
| RL                       | (%)         | 0       | 38.12 | 30.84 | 43.26 | 22.74 | 7.51 |
| BP                       | (%)         | 0       | 21.07 | 15.24 | 18.08 | 10.18 | 5.12 |
| PHYTOTOXICITY INDEX (PI) | AVERAGE     | 0       | 32.76 | 34.87 | 42.00 | 14.99 | 6.06 |
|                          | StDev       | 0       | 10.14 | 21.92 | 23.31 | 6.78  | 1.27 |

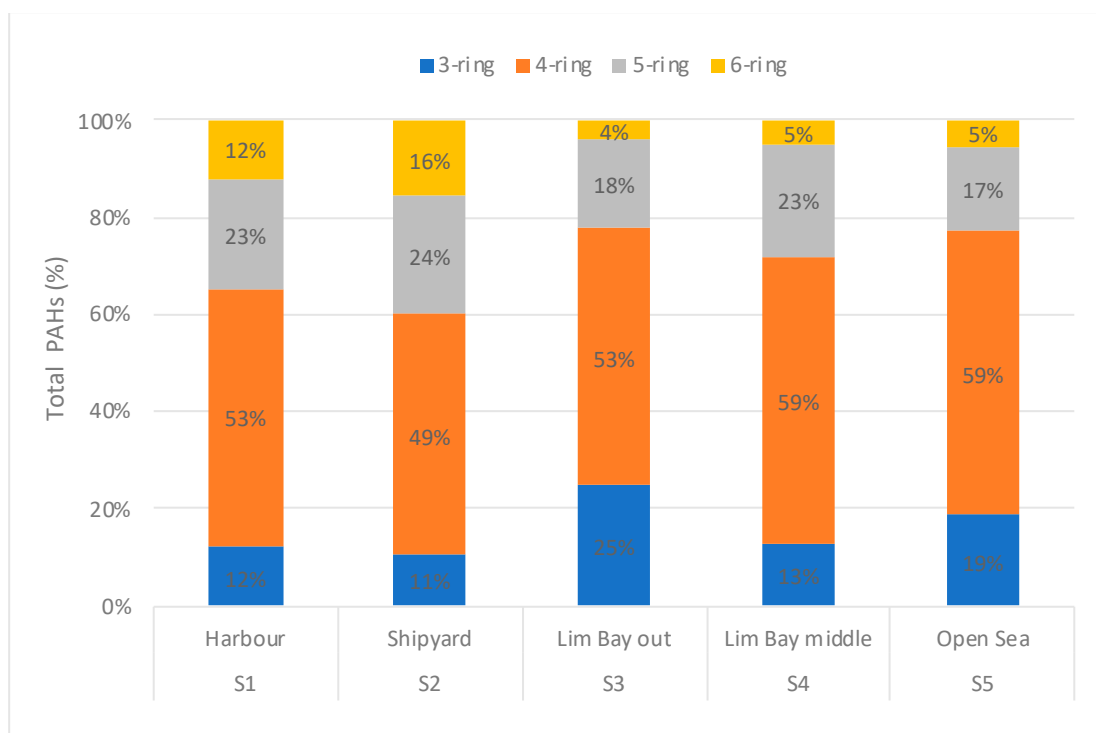

**Figure S1.** Polycyclic Aromatic Hydrocarbons structure distribution patterns in Rovinj marine sediments.
